# Supplementary material for: Low-temperature in situ preparation of Eu3+/Tb3+-doped CaMoO4/SrMoO4 nanoparticle thin films and their application in anti-counterfeiting
Source: Royal Society of Chemistry journal article supplement (doi:10.1039/d3dt02381h), 2023-01-01
Supplement: d3dt02381h1.pdf [file d3dt02381h1.pdf]

## Electronic Supplementary Information

### Low-Temperature In-Situ Preparation of $\text{Eu}^{3+}/\text{Tb}^{3+}$ -doped $\text{CaMoO}_4/\text{SrMoO}_4$ Nanoparticle Thin Films and Their Application in Anti-Counterfeiting

Jiejun Pan,<sup>a</sup> Guang Xu,<sup>a</sup> Sixue Ren,<sup>a</sup> Tingjie Xu,<sup>a</sup> Dongrui Li,<sup>a</sup> Mengxin Liu<sup>\*b</sup> Xinan Shi,<sup>\*a</sup> and Daocheng Pan<sup>\*a,b</sup>

<sup>a</sup>State Key Laboratory of Featured Metal Materials and Life-cycle Safety for Composite Structures; Guangxi Key Laboratory of Processing for Non-ferrous Metals and Featured Materials; MOE Key Laboratory of New Processing Technology for Nonferrous Metals and Materials; School of Resources, Environment and Materials, Guangxi University, Nanning 530004, China

<sup>b</sup>School of Chemistry and Chemical Engineering, Guangxi University, Nanning 530004, China

\*To whom correspondence should be addressed. E-mail: 2415332286@qq.com, xashi@gxu.edu.cn and dcpan@gxu.edu.cn

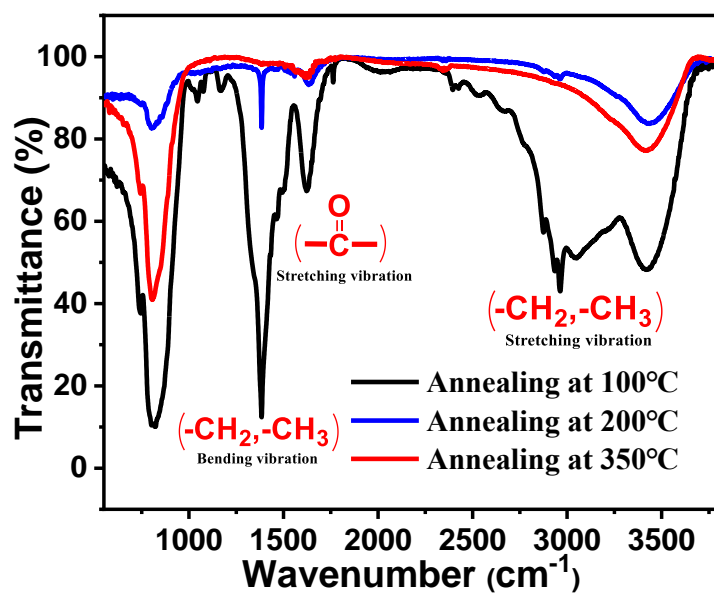

**Figure S1.** FT-IR spectra of butyric acid/butylamine-capped  $\text{Ca}_{0.90}\text{MoO}_4:\text{Eu}^{3+}_{0.10}$  nanoparticle thin films at different annealing temperatures.
